# Supplementary material for: Research of Fluridone’s Effects on Growth and Pigment Accumulation of Haematococcus pluvialis Based on Transcriptome Sequencing
Source: MDPI journal article supplement (doi:10.3390/ijms23063122), 2022-03-14
Supplement: s1 [file s1]

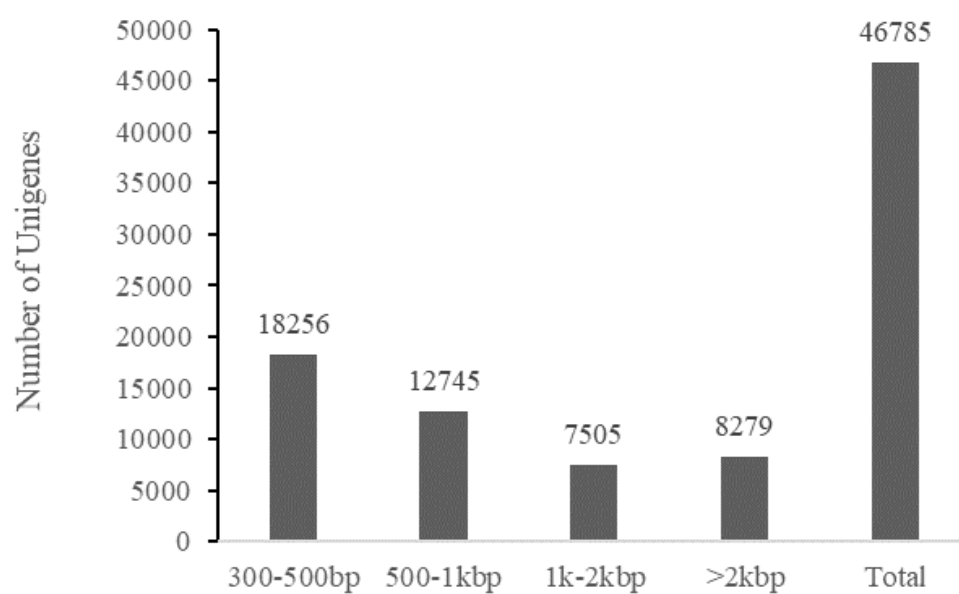

**Figure S1.** Length interval of unigenes, the abscissa in the figure is the gene length, and the ordinate is the number of transcripts/genes.

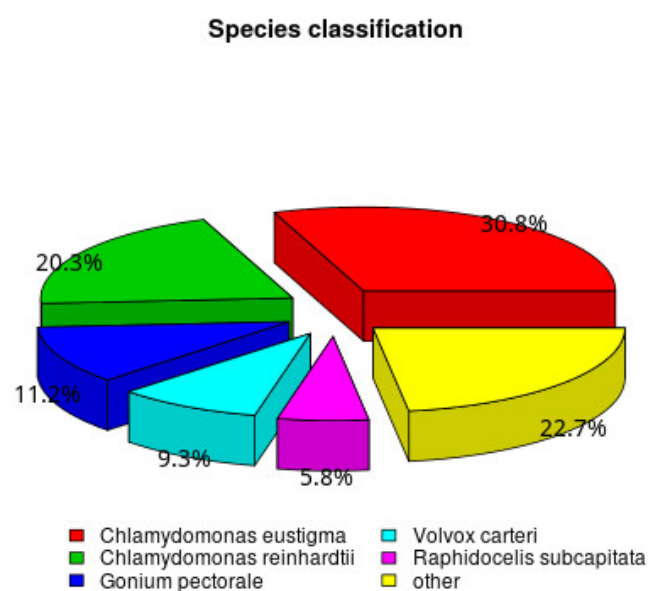

**Figure S2.** NR library comparison chart.

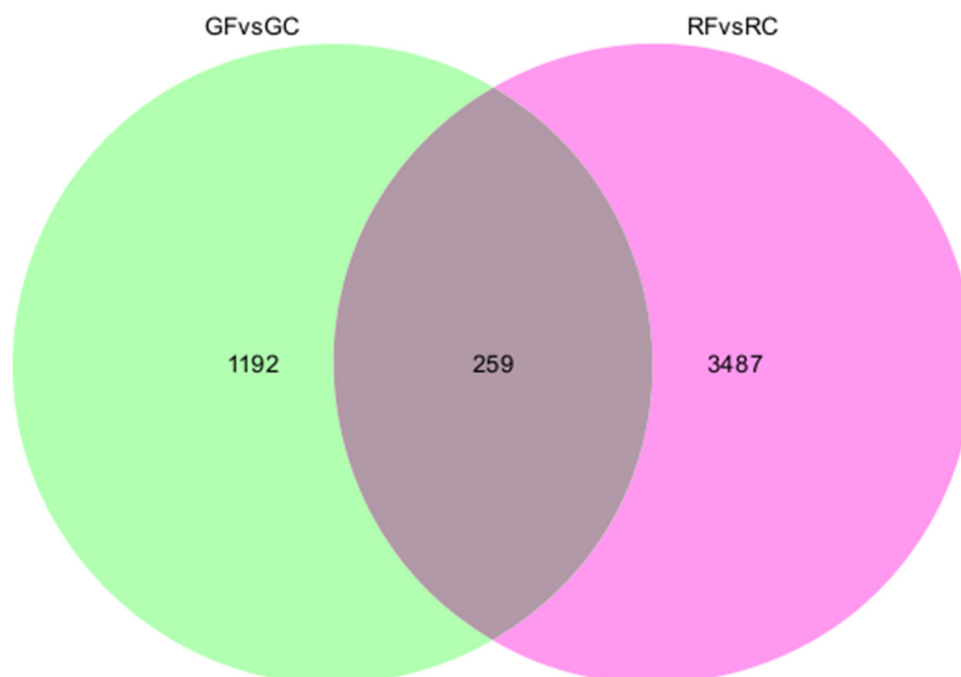

**Figure S3.** Venn diagram of differentially expressed genes co-expressed in green stage and red stage after fluridone treatment.

**Table S1.** Statistical display of differentially expressed genes.

| Compare | All  | Up   | Down |
|---------|------|------|------|
| GFvsGC  | 1451 | 435  | 1016 |
| RFvsRC  | 3746 | 1446 | 2300 |
